# Supplementary material
Source: MDPI journal article supplement (https://www.mdpi.com/2072-4292/8/5/414)
Supplement: s1 [file s1]

Archive with 2 entries (2 files):
- GH2O_ED_revised_SuppFigs.pdf
- GH2O_ED_revised_SuppTables.xlsx
