# Supplementary material
Source: MDPI journal article supplement (https://www.mdpi.com/2072-4292/8/5/414)
Supplement: s1 [file s1 › GH2O_ED_revised_SuppTables.xlsx]

## Sheet: Land_.5x.5deg
Results of the comparison for TANSO-FTS scans acquired over land within ±0.5° in latitude and longitude of the TCCON sites. For each site, the results are reported for the comparison with the average of TCCON soundings acquired within ±10 min., ±30 min., ±1 h and ±2 h of a collocated GOSAT overpasses. Grey background, green writing: results for stations included in the ensemble calculations; red …
Station	Lat [°]	Lon [°]	Alt [km]	Time crit.	# scans (pairs)	Abs. bias [ppm]	Abs. std [ppm]	Rel. bias [%]	Rel. Std [%]	Slope [ppm/ppm]	Intercept [ppm]	Corr.
Sodankylä	67.37	26.63	0.190	10 min
				30 min
				1 h
				2 h
Bialystok	53.23	23.02	0.130	10 min	13	242.17	590.33	18.55	35.44	0.83	501.79	0.85
				30 min	13	253.21	577.40	18.66	34.42	0.84	483.27	0.85
				1 h	15	216.06	526.03	15.38	31.58	0.87	388.68	0.87
				2 h	15	204.01	522.84	13.72	31.63	0.89	338.19	0.87
Bremen	53.10	8.85	0.030	10 min	6	36.39	46.49	1.23	2.81	1.06	-66.31	1.00
				30 min	10	20.93	40.94	0.86	2.55	1.03	-38.71	1.00
				1 h	13	-259.52	739.86	-6.13	17.79	0.83	198.33	0.76
				2 h	15	-241.64	713.08	-5.72	16.77	0.83	204.87	0.77
Karlsruhe	49.10	8.44	0.110	10 min	3	-119.85	157.81	-2.41	3.89	0.95	16.10	1.00
				30 min	6	-69.68	181.83	-0.43	7.51	0.97	35.14	1.00
				1 h	7	-74.24	138.33	-2.81	6.13	0.97	3.29	1.00
				2 h	7	-102.64	139.26	-3.23	5.59	0.95	15.82	1.00
Orléans	47.97	2.11	0.130	10 min	32	-291.06	463.38	-9.43	12.64	0.80	183.09	0.92
				30 min	33	-267.08	458.19	-8.67	12.51	0.82	156.64	0.92
				1 h	33	-259.87	469.49	-8.41	12.77	0.83	151.33	0.92
				2 h	38	-225.88	455.81	-7.22	12.52	0.85	136.47	0.92
Garmisch	47.48	11.06	0.750	10 min	23	-111.21	518.93	5.07	31.20	0.77	349.42	0.93
				30 min	23	-111.24	516.25	4.76	30.22	0.77	341.92	0.93
				1 h	23	-108.70	508.71	4.58	29.50	0.78	337.82	0.93
				2 h	25	-111.14	490.61	3.04	27.48	0.80	281.99	0.93
Park Falls	45.94	-90.27	0.440	10 min	71	97.36	841.40	12.72	44.75	0.72	484.51	0.64
				30 min	73	38.64	887.25	10.07	42.12	0.61	585.49	0.60
				1 h	78	-0.02	917.45	7.87	41.23	0.63	518.81	0.60
				2 h	78	-15.75	897.39	6.07	37.75	0.63	506.81	0.61
Indianapolis	39.86	-86.00	0.270	10 min	2	1.43	51.30	1.91	3.82	0.98	54.31	1.00
				30 min	2	3.07	61.11	2.40	4.69	0.98	65.78	1.00
				1 h	2	48.27	3.32	3.42	3.18	1.00	44.84	1.00
				2 h	2	244.60	300.88	7.79	5.55	1.14	-82.11	1.00
Lamont	36.60	-97.49	0.320	10 min	136	-172.08	552.62	-4.46	21.44	0.83	138.41	0.90
				30 min	146	-215.30	610.05	-5.53	21.87	0.80	168.25	0.89
				1 h	154	-221.41	610.72	-5.67	22.85	0.80	169.80	0.89
				2 h	165	-247.13	618.70	-6.96	23.83	0.77	180.18	0.89
Tsukuba	36.05	140.12	0.030	10 min	198	-40.97	199.46	-1.02	12.60	0.91	78.87	0.97
				30 min	199	-40.34	200.44	-0.84	12.75	0.92	75.30	0.97
				1 h	199	-37.96	204.17	-0.52	12.63	0.92	76.49	0.97
				2 h	204	-54.60	248.91	-0.69	12.99	0.89	105.06	0.96
Edwards	34.96	-117.88	0.700	10 min
				30 min
				1 h
				2 h
JPL	34.20	-118.18	0.390	10 min	18	172.81	401.66	12.73	24.89	0.98	172.59	0.91
				30 min	19	172.97	383.39	11.97	22.99	0.99	165.42	0.91
				1 h	19	175.54	387.04	11.73	22.51	0.99	154.66	0.91
				2 h	19	193.41	398.68	12.72	23.00	1.00	151.51	0.90
Pasadena	34.14	-118.13	0.240	10 min	86	107.12	524.02	4.11	25.96	1.08	-62.54	0.90
				30 min	97	12.22	598.28	0.50	26.80	1.00	1.95	0.86
				1 h	101	-73.19	809.06	-1.21	27.54	0.90	142.06	0.74
				2 h	103	-61.96	782.38	-1.15	26.68	0.92	115.07	0.75
Saga	33.24	130.29	0.010	10 min	32	-19.90	235.95	-0.26	16.49	1.00	-14.61	0.96
				30 min	43	-26.67	226.67	-1.47	16.29	1.03	-85.01	0.98
				1 h	46	-16.31	207.35	-1.06	15.83	1.03	-89.35	0.98
				2 h	48	-27.97	202.98	-1.47	15.37	1.01	-65.54	0.98
Darwin	-12.43	130.89	0.030	10 min	1	-147.77	---	-6.83	---	---	---	---
				30 min	1	-172.42	---	-7.88	---	---	---	---
				1 h	1	-165.70	---	-7.59	---	---	---	---
				2 h	1	-152.37	---	-7.03	---	---	---	---
La Réunion	-20.90	55.49	0.090	10 min
				30 min
				1 h
				2 h
Wollongong	-34.41	150.88	0.030	10 min	47	-340.64	399.49	-13.95	17.33	0.87	-83.02	0.95
				30 min	48	-338.08	384.70	-14.18	16.82	0.89	-113.44	0.95
				1 h	48	-336.52	383.30	-14.25	16.66	0.89	-117.36	0.95
				2 h	57	-395.28	408.87	-16.64	17.50	0.87	-173.03	0.94
Lauder 125	-45.05	169.68	0.370	10 min	145	-37.09	213.17	-1.71	13.95	0.96	28.03	0.95
				30 min	158	-48.31	232.78	-1.81	15.07	0.91	88.95	0.93
				1 h	162	-50.03	232.57	-1.99	14.81	0.92	80.35	0.93
				2 h	172	-66.93	229.55	-3.40	15.20	0.93	29.45	0.94
Station bias				10 min	11	-35.77	184.82	2.03	9.86	0.88	191.52	0.86
				30 min	12	-45.75	170.56	1.19	9.11	0.86	233.24	0.85
				1 h	12	-80.99	169.84	0.03	8.57	0.80	315.89	0.85
				2 h	12	-87.57	175.40	-0.64	8.62	0.82	282.74	0.83
Ensemble bias				10 min	801	-53.72	461.99	-0.22	23.16	0.89	102.94	0.90
				30 min	862	-75.46	484.44	-1.07	22.58	0.88	119.41	0.89
				1 h	891	-91.95	530.40	-1.50	22.66	0.87	129.40	0.87
				2 h	939	-109.86	527.82	-2.53	22.16	0.85	128.78	0.88

## Sheet: Land_01x01deg
Results of the comparison for TANSO-FTS scans acquired over land within ±1° in latitude and longitude of the TCCON sites. For each site, the results are reported for the comparison with the average of TCCON soundings acquired within ±10 min., ±30 min., ±1 h and ±2 h of a collocated GOSAT overpasses. Grey background, bold green type: results for stations included in the ensemble calculations; red …
Station	Lat [°]	Lon [°]	Alt [km]	Time crit.	# scans (pairs)	Abs. bias [ppm]	Abs. std [ppm]	Rel. bias [%]	Rel. Std [%]	Slope [ppm/ppm]	Intercept [ppm]	Corr.
Sodankylä	67.37	26.63	0.190	10 min	28	-296.57	539.49	-10.66	16.99	0.63	574.92	0.78
				30 min	30	-309.30	555.62	-10.67	17.34	0.64	557.51	0.76
				1 h	30	-315.43	559.12	-10.82	17.43	0.64	550.57	0.76
				2 h	30	-286.54	566.85	-9.73	17.53	0.69	477.14	0.75
Bialystok	53.23	23.02	0.130	10 min	19	191.43	535.76	14.99	31.64	0.79	576.57	0.84
				30 min	19	204.66	521.25	15.18	30.65	0.81	553.08	0.84
				1 h	24	153.51	466.97	10.48	28.22	0.88	348.90	0.87
				2 h	24	138.25	470.08	8.83	28.62	0.90	293.95	0.87
Bremen	53.10	8.85	0.030	10 min	6	36.39	46.49	1.23	2.81	1.06	-66.31	1.00
				30 min	10	20.93	40.94	0.86	2.55	1.03	-38.71	1.00
				1 h	13	-259.52	739.86	-6.13	17.79	0.83	198.33	0.76
				2 h	15	-241.64	713.08	-5.72	16.77	0.83	204.87	0.77
Karlsruhe	49.10	8.44	0.110	10 min	21	-258.70	310.82	-8.82	10.34	0.88	36.25	0.98
				30 min	39	-213.57	307.23	-8.06	11.50	0.90	32.40	0.98
				1 h	40	-211.55	297.57	-8.49	11.03	0.90	16.55	0.98
				2 h	44	-242.95	283.66	-9.60	10.21	0.89	14.91	0.98
Orléans	47.97	2.11	0.130	10 min	91	-191.94	445.02	-5.63	16.93	0.85	121.62	0.92
				30 min	94	-170.56	439.42	-4.98	16.61	0.88	95.51	0.93
				1 h	94	-165.65	447.58	-4.82	16.71	0.88	91.54	0.92
				2 h	106	-134.20	441.87	-3.69	16.32	0.91	73.02	0.92
Garmisch	47.48	11.06	0.750	10 min	57	-82.66	453.49	2.93	28.05	0.82	243.14	0.93
				30 min	58	-84.90	446.45	2.57	27.22	0.82	237.48	0.93
				1 h	59	-86.97	439.33	2.28	26.51	0.82	229.62	0.93
				2 h	63	-92.22	420.50	0.96	24.66	0.84	195.10	0.94
Park Falls	45.94	-90.27	0.440	10 min	136	-67.03	780.73	2.68	38.75	0.77	274.17	0.73
				30 min	138	-91.81	797.57	1.52	36.98	0.72	338.70	0.71
				1 h	148	-96.25	830.55	1.18	37.46	0.74	318.83	0.71
				2 h	153	-82.29	821.01	1.04	35.39	0.76	278.71	0.70
Indianapolis	39.86	-86.00	0.270	10 min	4	41.96	58.43	5.02	4.60	0.98	82.02	1.00
				30 min	4	45.57	63.23	5.57	4.91	0.97	92.05	1.00
				1 h	4	52.15	18.67	4.40	2.76	1.00	49.33	1.00
				2 h	4	146.67	208.11	6.22	4.09	1.14	-90.67	1.00
Lamont	36.60	-97.49	0.320	10 min	266	-188.83	562.99	-5.30	22.55	0.83	126.59	0.90
				30 min	284	-229.09	611.91	-6.22	22.68	0.81	141.03	0.90
				1 h	306	-235.19	616.48	-6.22	23.62	0.80	149.21	0.90
				2 h	335	-241.86	633.00	-6.76	24.46	0.79	153.82	0.89
Tsukuba	36.05	140.12	0.030	10 min	326	-72.97	248.16	-2.43	16.50	0.86	115.66	0.95
				30 min	327	-71.35	249.81	-2.21	16.77	0.87	109.37	0.95
				1 h	327	-68.85	253.97	-1.81	16.85	0.87	111.66	0.95
				2 h	338	-83.95	287.83	-1.90	16.73	0.84	136.44	0.94
Edwards	34.96	-117.88	0.700	10 min	56	358.39	425.80	25.12	26.69	1.09	139.09	0.94
				30 min	62	380.72	410.44	26.79	27.23	1.08	164.59	0.94
				1 h	62	379.16	404.73	26.48	26.85	1.08	162.20	0.94
				2 h	67	382.76	396.62	25.76	25.20	1.10	138.64	0.94
JPL	34.20	-118.18	0.390	10 min	56	-254.46	616.73	-12.62	30.22	0.86	-76.14	0.75
				30 min	64	-267.97	636.81	-10.47	34.91	0.80	17.66	0.72
				1 h	64	-269.58	644.69	-10.22	36.14	0.78	48.59	0.72
				2 h	64	-262.05	640.45	-11.16	31.68	0.81	10.00	0.72
Pasadena	34.14	-118.13	0.240	10 min	95	87.89	505.22	2.72	25.55	1.10	-137.43	0.91
				30 min	106	2.75	575.39	-0.47	26.23	1.03	-63.10	0.87
				1 h	110	-75.76	776.74	-2.03	26.90	0.94	52.61	0.76
				2 h	112	-65.86	751.84	-2.02	26.12	0.95	26.29	0.77
Saga	33.24	130.29	0.010	10 min	56	-74.33	441.19	-1.39	20.87	0.88	124.06	0.88
				30 min	69	-76.55	417.28	-2.40	20.25	0.96	-5.25	0.93
				1 h	73	-72.92	393.56	-2.75	19.86	0.96	-17.84	0.93
				2 h	76	-78.38	363.90	-3.19	19.18	0.95	-5.82	0.94
Darwin	-12.43	130.89	0.030	10 min	112	-410.99	823.00	-8.78	22.05	0.57	876.65	0.76
				30 min	113	-413.10	808.17	-8.97	21.59	0.57	877.48	0.77
				1 h	116	-405.58	774.53	-8.99	21.07	0.58	861.80	0.78
				2 h	116	-407.58	766.75	-9.40	20.43	0.59	834.73	0.78
La Réunion	-20.90	55.49	0.090	10 min
				30 min
				1 h
				2 h
Wollongong	-34.41	150.88	0.030	10 min	110	-379.08	488.05	-14.72	19.81	0.86	-67.36	0.93
				30 min	118	-406.71	495.65	-15.53	19.50	0.85	-60.10	0.93
				1 h	120	-416.83	488.56	-16.18	19.27	0.85	-74.63	0.92
				2 h	134	-442.33	470.05	-17.71	19.20	0.85	-154.94	0.92
Lauder 125	-45.05	169.68	0.370	10 min	154	-29.67	215.36	-1.18	14.57	0.95	31.07	0.94
				30 min	167	-41.78	232.47	-1.40	15.36	0.91	87.32	0.93
				1 h	174	-49.73	234.72	-2.02	15.27	0.92	72.90	0.93
				2 h	184	-67.16	230.45	-3.42	15.53	0.93	25.54	0.93
Station bias				10 min	15	-111.30	209.56	-1.54	10.25	0.80	319.96	0.87
				30 min	16	-110.48	208.34	-1.53	10.35	0.77	393.01	0.86
				1 h	16	-137.32	200.99	-2.50	9.91	0.74	434.39	0.86
				2 h	16	-138.00	200.78	-2.98	9.78	0.74	423.81	0.86
Ensemble bias				10 min	1583	-124.89	531.32	-2.71	24.07	0.85	130.37	0.89
				30 min	1698	-138.82	542.92	-3.09	24.04	0.84	140.71	0.89
				1 h	1760	-147.82	563.16	-3.35	24.30	0.84	144.01	0.88
				2 h	1861	-153.14	561.28	-3.88	23.69	0.84	135.91	0.88

## Sheet: Land_02x02deg
Results of the comparison for TANSO-FTS scans acquired over land within ±2° in latitude and longitude of the TCCON sites. For each site, the results are reported for the comparison with the average of TCCON soundings acquired within ±10 min., ±30 min., ±1 h and ±2 h of a collocated GOSAT overpasses. Grey background, green writing: results for stations included in the ensemble calculations; red wr…
Station	Lat [°]	Lon [°]	Alt [km]	Time crit.	# scans (pairs)	Abs. bias [ppm]	Abs. std [ppm]	Rel. bias [%]	Rel. Std [%]	Slope [ppm/ppm]	Intercept [ppm]	Corr.
Sodankylä	67.37	26.63	0.190	10 min	105	-125.44	470.21	-3.57	21.28	0.76	338.53	0.84
				30 min	116	-133.51	467.79	-3.88	20.62	0.79	295.88	0.85
				1 h	118	-124.59	458.52	-3.51	19.98	0.80	282.23	0.86
				2 h	121	-116.18	459.33	-3.12	20.08	0.82	256.43	0.86
Bialystok	53.23	23.02	0.130	10 min	60	123.22	530.32	10.37	30.98	0.89	288.01	0.85
				30 min	61	131.58	517.58	10.51	30.18	0.90	276.55	0.85
				1 h	70	105.07	508.06	8.03	30.95	0.93	194.12	0.86
				2 h	70	98.98	509.91	7.02	30.61	0.95	155.34	0.85
Bremen	53.10	8.85	0.030	10 min	20	35.62	277.42	2.55	19.08	1.08	-240.86	0.92
				30 min	32	-42.81	304.64	-1.66	19.41	1.03	-162.25	0.93
				1 h	41	-216.07	555.50	-5.76	21.62	0.90	32.10	0.85
				2 h	48	-220.09	541.66	-6.07	22.87	0.85	96.21	0.86
Karlsruhe	49.10	8.44	0.110	10 min	65	-306.97	414.66	-11.63	15.23	0.88	-18.28	0.95
				30 min	108	-255.41	407.23	-10.27	15.48	0.92	-45.86	0.94
				1 h	113	-241.44	402.25	-9.86	15.32	0.92	-46.17	0.94
				2 h	123	-258.40	384.56	-10.20	14.64	0.91	-42.11	0.95
Orléans	47.97	2.11	0.130	10 min	182	-120.53	482.01	-1.86	22.67	0.86	144.82	0.89
				30 min	192	-108.15	483.17	-1.64	22.11	0.89	113.40	0.90
				1 h	201	-100.30	477.20	-1.54	21.48	0.90	103.66	0.90
				2 h	225	-80.13	474.24	-0.96	20.79	0.91	89.81	0.90
Garmisch	47.48	11.06	0.750	10 min	132	-125.01	514.25	2.55	32.71	0.75	334.92	0.90
				30 min	134	-135.53	521.10	2.00	32.61	0.74	345.93	0.90
				1 h	135	-134.55	518.65	1.79	32.05	0.74	339.06	0.90
				2 h	146	-154.87	539.69	0.83	31.10	0.73	357.23	0.89
Park Falls	45.94	-90.27	0.440	10 min	240	-100.41	808.68	2.44	38.72	0.73	383.90	0.70
				30 min	248	-125.25	820.85	1.29	37.60	0.68	429.83	0.69
				1 h	265	-136.61	850.39	0.77	38.00	0.70	402.14	0.69
				2 h	278	-144.80	848.06	0.02	36.68	0.71	352.27	0.68
Indianapolis	39.86	-86.00	0.270	10 min	50	26.19	212.99	3.08	12.59	0.96	76.07	0.97
				30 min	50	35.60	208.29	3.87	12.92	0.96	83.28	0.98
				1 h	53	46.08	189.25	4.10	12.52	0.98	65.25	0.98
				2 h	53	60.10	172.76	4.09	11.04	1.00	31.70	0.98
Lamont	36.60	-97.49	0.320	10 min	590	-179.02	618.44	-2.83	31.64	0.80	170.51	0.89
				30 min	649	-237.88	666.19	-4.82	31.73	0.78	188.18	0.88
				1 h	701	-246.26	668.76	-5.15	31.68	0.77	200.32	0.88
				2 h	756	-237.84	674.43	-5.02	31.36	0.77	196.18	0.87
Tsukuba	36.05	140.12	0.030	10 min	405	-122.02	343.95	-4.29	18.58	0.80	153.82	0.93
				30 min	411	-129.21	355.39	-4.29	18.89	0.80	153.32	0.94
				1 h	411	-126.97	357.70	-3.96	18.96	0.81	154.18	0.94
				2 h	423	-136.92	374.54	-3.96	18.66	0.80	168.17	0.93
Edwards	34.96	-117.88	0.700	10 min	65	316.63	409.59	23.25	26.06	1.09	92.46	0.94
				30 min	71	339.57	399.47	24.91	26.77	1.09	108.83	0.94
				1 h	71	338.15	394.16	24.59	26.36	1.09	106.00	0.94
				2 h	76	343.23	388.49	23.89	24.83	1.10	87.26	0.94
JPL	34.20	-118.18	0.390	10 min	122	-193.84	524.08	-7.47	24.98	0.86	58.60	0.86
				30 min	135	-202.76	533.39	-6.99	27.60	0.84	92.65	0.85
				1 h	135	-199.21	537.45	-6.67	28.33	0.83	104.67	0.85
				2 h	138	-190.66	529.45	-6.89	25.62	0.85	86.67	0.85
Pasadena	34.14	-118.13	0.240	10 min	95	87.89	505.22	2.72	25.55	1.10	-137.43	0.91
				30 min	106	2.75	575.39	-0.47	26.23	1.03	-63.10	0.87
				1 h	110	-75.76	776.74	-2.03	26.90	0.94	52.61	0.76
				2 h	112	-65.86	751.84	-2.02	26.12	0.95	26.29	0.77
Saga	33.24	130.29	0.010	10 min	79	-92.63	446.88	-3.21	23.56	0.86	112.77	0.89
				30 min	102	-102.20	412.16	-4.70	22.03	0.95	-24.68	0.93
				1 h	107	-102.98	395.23	-5.36	21.84	0.96	-42.30	0.93
				2 h	114	-115.26	379.46	-5.94	21.35	0.94	-22.18	0.94
Darwin	-12.43	130.89	0.030	10 min	133	-445.77	800.37	-10.82	21.90	0.65	554.82	0.78
				30 min	134	-444.78	786.83	-10.92	21.51	0.65	551.59	0.79
				1 h	137	-438.90	758.88	-10.93	21.09	0.66	534.84	0.79
				2 h	138	-447.84	752.26	-11.50	20.53	0.67	511.05	0.79
La Réunion	-20.90	55.49	0.090	10 min
				30 min
				1 h
				2 h
Wollongong	-34.41	150.88	0.030	10 min	222	-384.15	534.14	-14.79	22.09	0.82	0.07	0.90
				30 min	241	-417.57	550.75	-15.79	21.80	0.81	-0.11	0.89
				1 h	243	-422.16	541.37	-16.18	21.70	0.81	-8.06	0.89
				2 h	270	-441.85	535.85	-17.37	22.27	0.80	-64.60	0.89
Lauder 125	-45.05	169.68	0.370	10 min	160	-27.41	230.78	-0.68	16.65	0.94	53.36	0.94
				30 min	173	-39.12	245.23	-0.93	17.11	0.90	105.80	0.93
				1 h	180	-46.79	246.96	-1.55	16.96	0.90	91.91	0.93
				2 h	190	-63.40	241.79	-2.94	16.91	0.92	44.56	0.93
Station bias				10 min	17	-96.10	186.82	-0.83	8.85	0.75	437.74	0.87
				30 min	17	-109.69	186.84	-1.40	9.10	0.71	504.38	0.86
				1 h	17	-124.90	182.94	-1.95	8.92	0.70	519.90	0.87
				2 h	17	-127.75	187.57	-2.36	8.89	0.69	538.19	0.87
Ensemble bias				10 min	2725	-143.95	560.61	-2.70	27.18	0.83	162.19	0.88
				30 min	2963	-166.22	575.61	-3.55	27.05	0.82	164.97	0.87
				1 h	3091	-172.68	587.84	-3.80	27.12	0.82	166.42	0.87
				2 h	3281	-176.41	588.30	-4.16	26.61	0.82	163.26	0.87

## Sheet: Ocean_02x02deg
Results of the comparison for TANSO-FTS scans acquired over ocean within ±2° in latitude and longitude of the TCCON sites (there are no ocean coincidences for stricter spatial criteria). For each site, the results are reported for the comparison with the average of TCCON soundings acquired within ±10 min., ±30 min., ±1 h and ±2 h of a collocated GOSAT overpasses. The number of matched scans is gi…
Station	Lat [°]	Lon [°]	Alt [km]	Time crit.	# scans (pairs)	Abs. bias [ppm]	Abs. std [ppm]	Rel. bias [%]	Rel. Std [%]	Slope [ppm/ppm]	Intercept [ppm]	Corr.
Saga	33.24	130.29	0.010	10 min	2	-82.48	1726.93	-13.57	42.40	1.62	-3157.72	1.00
				30 min	3	-109.39	1258.33	-10.79	31.29	1.25	-1055.39	0.97
				1 h	3	-96.04	1190.40	-10.43	30.12	1.24	-1020.13	0.98
				2 h	4	-239.38	989.16	-8.89	23.08	1.03	-406.65	0.96
Darwin	-12.43	130.89	0.030	10 min	21	-434.77	679.61	-8.81	13.38	1.01	-624.97	0.91
				30 min	23	-440.47	616.51	-8.73	12.29	1.02	-653.12	0.93
				1 h	24	-457.18	589.38	-8.80	11.73	1.01	-601.15	0.93
				2 h	24	-456.89	577.53	-8.71	11.55	1.00	-560.21	0.93
La Réunion	-20.90	55.49	0.090	10 min	4	-721.25	207.28	-12.32	4.31	1.32	-2627.45	1.00
				30 min	4	-723.04	227.49	-12.36	4.59	1.36	-2883.30	1.00
				1 h	6	-286.43	680.50	-4.94	11.80	1.49	-3476.99	0.64
				2 h	8	58.99	745.44	1.48	13.61	0.31	3685.79	0.38
Wollongong	-34.41	150.88	0.030	10 min	1	-520.30	---	-12.90	---	---	---	---
				30 min	1	-281.14	---	-7.41	---	---	---	---
				1 h	1	-340.15	---	-8.83	---	---	---	---
				2 h	1	-127.78	---	-3.51	---	---	---	---
Station bias				10 min	4	-439.70	266.70	-11.90	2.12	0.78	700.76	0.95
				30 min	4	-388.51	260.80	-9.82	2.19	0.75	822.28	0.99
				1 h	4	-294.95	150.55	-8.25	2.34	0.93	119.73	0.99
				2 h	4	-191.27	215.66	-4.91	4.94	1.02	-233.45	0.98
Ensemble bias				10 min	28	-453.59	691.81	-9.80	14.29	1.09	-1082.73	0.93
				30 min	31	-439.75	641.81	-9.35	13.42	1.00	-592.52	0.94
				1 h	34	-391.74	641.33	-8.26	13.22	1.01	-590.88	0.93
				2 h	37	-312.94	669.92	-6.38	13.56	1.00	-357.86	0.92
